# Supplementary material for: The antiepileptic drug valproic acid and other medium-chain fatty acids acutely reduce phosphoinositide levels independently of inositol in Dictyostelium
Source: PubMed Central journal article supplement — Dis Model Mech. 2011 Aug 29;5(1):115–24. doi: 10.1242/dmm.008029 (PMC3255550; doi:10.1242/dmm.008029), 2011-08-29
Supplement: supp_008029_DMM008029FigS1.pdf [file supp_008029_DMM008029FigS1.pdf]

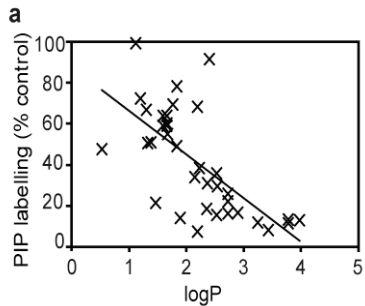

**Fig. S1.** Comparison of lipophilicity (logP) values with PIP labelling show increased phosphoinositide attenuation with lipophilicity ( $P < 0.001$ ) for novel VPA-related compounds.
