# Supplementary material for: The antiepileptic drug valproic acid and other medium-chain fatty acids acutely reduce phosphoinositide levels independently of inositol in Dictyostelium
Source: PubMed Central journal article supplement — Dis Model Mech. 2011 Aug 29;5(1):115–24. doi: 10.1242/dmm.008029 (PMC3255550; doi:10.1242/dmm.008029), 2011-08-29
Supplement: supp_008029_DMM008029TableS1.pdf [file supp_008029_DMM008029TableS1.pdf]

**Table S1. Phosphoinositide attenuation in *Dictyostelium* by VPA and other compounds**

| <b>Chemical category</b>    | <b>Chemical (common name)</b> | <b>Chemical (IUPAC nomenclature)</b>          | <b>PIP Level (% control)</b> | <b>s.d.</b> |
|-----------------------------|-------------------------------|-----------------------------------------------|------------------------------|-------------|
|                             | valproic acid (VPA)           | 2-propylpentanoic acid                        | 32.0                         | 8.7         |
| Straight-chain acids        |                               |                                               |                              |             |
|                             | valeric acid                  | pentanoic acid                                | 66.9                         | 7.8         |
|                             | n-caproic acid                | hexanoic acid                                 | 49.2                         | 10.1        |
|                             | enanthoic acid                | heptanoic acid                                | 31.2                         | 5           |
|                             | caprylic acid                 | octanoic acid                                 | 16.7                         | 3.4         |
|                             | pelagonic acid                | nonanoic acid                                 | 8                            | 1.7         |
|                             | capric acid                   | decanoic acid                                 | 12.9                         | 1.4         |
|                             | Lauric acid                   | dodecanoic acid                               | 42                           | 3           |
|                             | Margaric acid                 | heptadecanoic acid                            | 92.3                         | 2.8         |
| 4-6 carbon backbone acids   |                               |                                               |                              |             |
|                             | Isovaleric Acid               | 3-methylbutanoic acid                         | 99.1                         | 11.4        |
|                             | TBA                           | tert-butylacetic acid                         | 21.4                         | 4.1         |
|                             | PIA                           | propylisopropylacetic acid                    | 15.4                         | 2.2         |
|                             | DIA                           | diisopropylacetic acid                        | 18.6                         | 4.5         |
|                             | 2M2P                          | 2-methyl-2-pentenoic acid                     | 14.8                         | 3.8         |
|                             |                               | 2-ethyl-4-methylpentanoic acid                | 54.8                         | 0.1         |
|                             |                               | 4-methylhexanoic acid                         | 68                           | 3           |
|                             |                               | S-2-pentyl-4-pentynoic acid                   | 82                           | 7           |
|                             |                               | 2-methylhexanoic acid                         | 68.1                         | 14.8        |
|                             |                               | 5-methylhexanoic acid                         | 7.2                          | 0.7         |
|                             |                               | 2-ethylhexanoic acid                          | 22.2                         | 5.3         |
| 7 - 9 carbon backbone acids |                               |                                               |                              |             |
|                             |                               | 2-methylheptanoic acid                        | 16.1                         | 6.4         |
|                             |                               | 4-methyloctanoic acid                         | 12                           | 1.3         |
|                             |                               | 4-ethyloctanoic acid                          | 13.2                         | 1.8         |
|                             |                               | 4-methylnonanoic acid                         | 45                           | 16          |
| Other acids                 |                               |                                               |                              |             |
|                             | TMCA                          | tetramethylcyclopropane carboxylic acid       | 33.9                         | 7.7         |
| Amides                      |                               |                                               |                              |             |
|                             | valpromide (VPD)              | 2-propylpentamide                             | 69.3                         | 13.3        |
|                             | TMCD                          | tetramethylcyclopropane-carboxamide           | 72.5                         | 7.2         |
|                             | MTMCD                         | N-methyl-tetramethyl-cyclopropane carboxamide | 50.8                         | 6.9         |
|                             | PID                           | propylisopropylacetamide                      | 59                           | 12.2        |
|                             |                               | Tert-butyl amide                              | 47.6                         | 12          |
|                             |                               | n-propyl 2-methylvalerate                     | 121                          | 13.6        |
| Aldehydes                   |                               |                                               |                              |             |
|                             |                               | methylvalerate                                | 46                           | 5.5         |
|                             | valeraldehyde                 | octanal                                       | 260                          | 199         |
|                             |                               | nonanal                                       | 99                           | 13          |
| Alcohols                    |                               |                                               |                              |             |
|                             |                               | 2-butyl-1-octanol                             | 93                           | 53          |
|                             |                               | 2-hexyl-1-decanol                             | 191                          | 38          |

Compounds are divided by backbone size, straight or branched, and derivitization. Common names and IUPAC nomenclature is included. Data are provided for residual PIP production ( $\pm$  s.d.) in the presence of 0.5 mM treatment over a 9 minute period. Each value represents triplicate experiments in duplicate.
