# Supplementary material for: The antiepileptic drug valproic acid and other medium-chain fatty acids acutely reduce phosphoinositide levels independently of inositol in Dictyostelium
Source: PubMed Central journal article supplement — Dis Model Mech. 2011 Aug 29;5(1):115–24. doi: 10.1242/dmm.008029 (PMC3255550; doi:10.1242/dmm.008029), 2011-08-29
Supplement: supp_008029_DMM008029TableS2.pdf [file supp_008029_DMM008029TableS2.pdf]

**Table S2. Comparison of pKa and phosphoinositide turnover activity for straight chain fatty acids in *Dictyostelium***

| <b>Acid</b>        | <b>Carbon atoms</b> | <b>pKa</b> | <b>PIP level % control</b> | <b>SD</b> |
|--------------------|---------------------|------------|----------------------------|-----------|
| VPA                | 8                   | 4.6        | 32.0                       | 8.7       |
| Pentanoic acid     | 5                   | 4.84       | 66.9                       | 7.8       |
| Hexanoic acid      | 6                   | 4.85       | 49.2                       | 10.1      |
| Heptanoic acid     | 7                   | 4.89       | 31.2                       | 5         |
| Octanoic acid      | 8                   | 4.89       | 16.7                       | 3.4       |
| Nonanoic acid      | 9                   | 4.95       | 8                          | 1.7       |
| Decanoic acid      | 10                  | 4.90       | 12.9                       | 1.4       |
| dodecanoic acid:   | 11                  | 4.85       | 42                         | 3         |
| heptadecanoic acid | 17                  | 4.78       | 92.3                       | 2.8       |

Data are provided for residual PIP production ( $\pm$  s.d.) in the presence of 0.5 mM treatment over a 9 minute period. Each value represents triplicate experiments in duplicate.
